# Supplementary material for: Rubella Virus Triggers Type I Interferon Antiviral Response in Cultured Human Neural Cells: Involvement in the Control of Viral Gene Expression and Infectious Progeny Production
Source: MDPI journal article supplement (doi:10.3390/ijms23179799), 2022-08-29
Supplement: s1 [file s1]

## **Supplementary Table S1**

**Title:** Rubella Virus Triggers Type I Interferon Antiviral Response in Cultured Human Neural Cells: Involvement in the Control of Viral Gene Expression and Infectious Progeny Production

**Authors:** Sayuri Sakuragi, Huanan Liao, Kodai Yajima, Shigeyoshi Fujiwara, and Hiroyuki Nakamura

Table S1: Primers used for RT-PCR

| Gene                      | Forward primer (5'-3') | Reverse primer (5'-3')   |
|---------------------------|------------------------|--------------------------|
| IFN- $\alpha$ (consensus) | AGAATCTCTCCTTTCTCCTG   | TCTGACAACCTCCCAGGCAC     |
| IFN- $\beta$              | ATGACCAACAAGTGTCTCCTCC | TCAGTTTCGGAGGTAACCTGTAAG |
| ISG56                     | GATGACGATGAAATGCCTGA   | GCCCGCTCATAGTACTCCAG     |
| MAVS                      | CCTACCACCTTGATGCCTGT   | AAAGGTGCCCTCGGACTTAT     |
| MDA5                      | TGCTCACAGTGGTTCAGGAG   | TAAGCCTTTGTGCACCATCA     |
| MX1                       | GCTACACACCGTGACGGATA   | TTCAGGAGCCAGCTGTAGGT     |
| OAS1                      | CTATCTCTTGCCAGACACGTG  | CTCAGCCTCTTGTGCCAGCTG    |
| RV capsid                 | GCTTCTACTACCCCCATCACC  | GGCGCGCGCGGTGCCAACGGCGA  |
| TBP                       | TTCGGAGAGTTCTGGGATTGTA | TGGACTGTTCTTCACTCTTGGC   |
| Viperin                   | GTGAGCAATGGAAGCCTGAT   | TCCTTCCGTCCCTTTCTACA     |
